# Supplementary material for: Expression Profile of Glossina pallidipes MicroRNAs During Symptomatic and Asymptomatic Infection With Glossina pallidipes Salivary Gland Hypertrophy Virus (Hytrosavirus)
Source: Front Microbiol. 2018 Sep 3;9:2037. doi: 10.3389/fmicb.2018.02037 (PMC6129597; doi:10.3389/fmicb.2018.02037)
Supplement: TABLE S2 — Sequencing reads matched to the GpSGHV-UGA genome. The location, length of the sRNA reads, as well as the ORF of their origin on the GpSGHV genome are shown. The green highlighted reads were identified as GpSGHV-encoded miRNAs based on the pre-miRNA prediction (i.e., the presence of mature miRNA and mfe <−20 kcal/mol) and the secondary structure analysis. [file Table_2.XLSX]

## Sheet: Sheet1
No.	Sequence	Location on GpSGHV genome	Sequence length	GpSGHV-UGA ORF
	Symptomatic library R1
1	TGGAGCAGGTGAGAGTATTATCGTAAGT	72900-72927	28	N/A
2	TATACTTTGACTGGCTCTGTCTA	164259- 164277	19	N/A
3	CGAAAAATGAACAATGGCGGTTTTT	164504-164527	24	N/A
4	TTGCTGTTATTGTTCAGAGTTA	164640-164661	22	N/A
5	TTTACTCATGCTTTGCTCTTCA	164755-164773	19	N/A
6	TCATGCTTTGCTCTTCAGATA	164757-164775	19	N/A
7	TGCTTTGCTCTTCAGACGTTT	164760-164780	21	N/A
8	TCCATCTCCGCTGGCTTCGCAA	164849-164869	21	N/A
9	TACTGCAGCTGCGGTCGATCAA	164873-164893	21	N/A
10	ATCGATCTGAAGAATCTA	165985-166001	17	ORF128
11	TCGATTCACTCAGCCGTACAA	166031-166050	20	N/A
12	TTGCTTCAAACCGACACCATA	166052-166071	20	N/A
13	AATCATGTCGACGAAGAACA	170002-170020	19	ORF132
	Asymptomatic library R2
1	TTAAAACCCTCCACCATATGTA	27526-27543	18	ORF023
2	TTAAAACCCTCCACCATATGTA	27526-27543	18	ORF023
3	TGCCATAGTTTTTAAATTGCAAT	170144-170165	22	ORF132
	Symptomatic library R2
1	TACACGTCCGAAACATATCAAC	151549-151569	21	ORF114
2	TTAACGTATAAATAGCAGTAGATTATCA	158687-158711	25	N/A
3	TGCACGTATAAATAGCAGTAGATTATCA	158687-158711	25	N/A
4	TAGACGTATAAATAGCAGTAGATTATCA	158687-158711	25	N/A
5	TGCACGTATCAATAGCAGTAGATTATCA	158685-158711	27	N/A
6	AAGCACGTATCAATAGCAGTAGATTATCA	158684-158711	28	N/A
7	TCACGTATCAATAGCAGTAGATTATCA	158686-158711	26	N/A
8	TAGTGCGTATCCATCTGAAGAA	161208-161229	22	ORF124
9	TACCGCCGAAAATCTCATCTCT	161250-161271	22	ORF124
10	TGTCTCATACCCGAAATCAAA	161895-161915	21	ORF124
11	CTTCTATATACTTTGACTA	164253-164270	18	N/A
12	CCATCCGACTATATTGACTTGA	164310-164330	21	N/A
13	CGAAAAATGAACAATGGCA	164504-164521	18	N/A
14	AATGAACAATGGCGGTTTTCA	164509-164528	20	N/A
15	TAAAAGGATAATGGAGCTCATTC	164529-164549	21	N/A
16	TTAAAAATTGCTGCTGAGAA	164603-164621	19	N/A
17	TCTGTTATTGTTCAGAGTTACG	164643-164663	21	N/A
18	TCTGTTATTGTTCAGAGTTACG	164643-164663	21	N/A
19	TTTTCAGAGTTACGAGATCG	164652-164669	18	N/A
20	TAGAGTTACGAGATCGCTAGTT	164655-164675	21	N/A
21	TGCGTCCACCGATTGACTCATG	164742-164761	20	N/A
22	TGCTTTGCTCTTCAGACGTTTT	164760-164781	22	N/A
23	TACTCTTCAGACGTTTTTA	164767-164783	17	N/A
24	TTACTGATGATGATGAAATGTA	164786-164805	20	N/A
25	TGATGAAATGCTTTGACCCCA	164796-164814	19	N/A
26	TATGCTTTGACCCATGAAGATT	164803-164823	21	N/A
27	ATTTGGACTCGATATGGATCAA	164821-164842	22	N/A
28	TGGATTACTCTGGTTTTAACTTA	165531-165552	22	N/A
29	TCTTCAAATTCGCGTTCTAA	165844-165862	19	ORF128
30	TACCCAATCGATCTGAAGAATA	165979-165999	21	ORF128
31	TACCCAATCGATCTGAAGAATA	165979-165999	21	ORF128
32	TGCTTCAAACCGACACCATA	166052-166071	20	N/A
33	TGATCAAACTGGAACAAGCA	169958-169977	20	ORF132
34	TCGATCATGTCGACGAAGAACA	170000-170020	21	ORF132
35	CGATCATGTCGACGAAGAACAG	170000-170020	21	ORF132
36	AAGAACAAAGACAAACGA	170014-170031	18	ORF132
37	TACTTGGAGAATAATAGGAGC	170126-170145	20	ORF132
38	TTGTCAGTAGAAGAAACAGTT	172835-172855	21	N/A
39	TAAAATGGCAAGCGACCGAAGACA	173877-173900	24	ORF139
40	ATGGAAAGCGACCGAAGACAA	173881-173901	21	ORF139
