# Supplementary material for: Expression Profile of Glossina pallidipes MicroRNAs During Symptomatic and Asymptomatic Infection With Glossina pallidipes Salivary Gland Hypertrophy Virus (Hytrosavirus)
Source: Front Microbiol. 2018 Sep 3;9:2037. doi: 10.3389/fmicb.2018.02037 (PMC6129597; doi:10.3389/fmicb.2018.02037)
Supplement: TABLE S3 — Host miRNAs identified in sRNA libraries of asymptomatically and symptomatically infected G. pallidipes. The mature miRNA sequence, the miRNA gene families, total reads of each of the identified miRNA and their normalized expression levels are shown. [file Table_3.XLSX]

## Sheet: Sheet1
miRNA Name	Mature sequence	Gene family	Asymptomatic raw RC R1	Symptomatic raw RC R1	Asymptomatic raw RC R2	Symptomatic raw RC R2	Asymptomatic Normalized RC R1	Symptomatic Normalized RC R1	Asymptomatic Normalized RC R2	Symptomatic Normalized RC R2	Mean_Asymptomatic Normalized RC	Mean_Symptomatic Normalized RC	Log2FC
miR-276-3p	AAGAGCACGGTATGAAGTTCCTA	MIPF0000124; mir-276	6	3	16	16	1313.77	673.25	1025.71	1349.87	1169.74	1011.56	-0.209607
miR-276-5p	TAGGAACTCTATACCTCGCT	MIPF0000124; mir-276	4	9	23	17	875.848	2019.75	1474.45	1434.24	1175.15	1726.99	0.555416
miR-1-3p	TGGAATGTAAAGAAGTATGGAG	MIPF0000038; mir-1	97	111	585	322	21239.3	24910.2	37502.4	27166.1	29370.9	26038.2	-0.173757
miR-1-5p	CTTCCATACTTCTTTACATTCCA	MIPF0000038; mir-1	11	6	36	27	2408.58	1346.5	2307.84	2277.9	2358.21	1812.2	-0.37995
miR-277-3p	TAAATGCACTATCTGGTACGAC	MIPF0000156; mir-277	45	27	118	106	9853.3	6059.25	7564.59	8942.88	8708.94	7501.06	-0.215402
bantam-5p	AAATCAGCTTTCAAAATGATCTCAC	MIPF0000153; bantam	7	8	42	25	1532.73	1795.33	2692.48	2109.17	2112.61	1952.25	-0.113886
miR-8-3p	TAATACTGTCAGGTAAAGATGTC	MIPF0000019; mir-8	25	24	156	135	5474.05	5386	10000.6	11389.5	7737.35	8387.76	0.116446
miR-8-5p	CATCTTACCGGGCAGCATTATAA	MIPF0000019; mir-8	3	0	4	0	656.886	0	256.427	0	456.657	0	NA
miR-9-3p	TCATACAGCTAGATAACCAAAGA	MIPF0000014; mir-9	18	20	58	30	3941.32	4488.33	3718.19	2531	3829.75	3509.67	-0.125917
miR-9-5p	TCTTTGGTATTCTAGCTGTAAA	MIPF0000014; mir-9	5	3	17	2	1094.81	673.25	1089.81	168.734	1092.31	420.992	-1.37552
miR-31-5p	TGGCAAGATGTCGGCATAGCTG	MIPF0000064; mir-31	10	6	62	44	2189.62	1346.5	3974.61	3712.14	3082.12	2529.32	-0.285172
miR-6497	CGTAACTTCGGGATAAGGATTGGCTCTGA	MIPF0001965; mir-6497	13	0	75	29	2846.51	0	4808	2446.64	3827.25	1223.32	-1.64551
miR-283-5p	AAATATCAGCTGGTAATTCTG	MIPF0000054; mir-216	2	3	26	16	437.924	673.25	1666.77	1349.87	1052.35	1011.56	-0.057032
miR-7-3p	CAACAAAATCACTAGTCTTCCA	MIPF0000022; mir-7	5	3	25	23	1094.81	673.25	1602.67	1940.44	1348.74	1306.84	-0.0455247
miR-996-3p	CTAAATAATCAAGTTCGGTCAACTTT	MIPF0000449; mir-996	0	0	1	0	0	0	64.1067	0	32.0533	0	NA
miR-184-3p	TGGACGGAGAACTGATAAGGGC	MIPF0000059; mir-184	7	9	23	42	1532.73	2019.75	1474.45	3543.41	1503.59	2781.58	0.887488
miR-263-5p	AATGGCACTGGAAGAATTCACGG	MIPF0000122; mir-263	2	3	14	11	437.924	673.25	897.493	928.035	667.709	800.642	0.261939
miR-999-3p	TGTTAACTGTAAGACTGTGTCT	MIPF0000852; mir-999	4	1	17	10	875.848	224.417	1089.81	843.668	982.831	534.042	-0.879989
miR-10-5p	AAACCTCTCTAGAACCGAATTTG	MIPF0000033; mir-10	0	0	0	1	0	0	0	84.3668	0	42.1834	NA
miR-10-3p	AACAAATTCGGATCTACAGGGT	MIPF0000033; mir-10	1	0	1	1	218.962	0	64.1067	84.3668	141.534	42.1834	-1.7464
miR-279-3p	TGACTAGATCCACACTCATT	MIPF0000184; mir-279	1	5	16	14	218.962	1122.08	1025.71	1181.14	622.334	1151.61	0.887889
miR-305-5p	ATTGTACTTCATCAGGTGCTCTGG	MIPF0000158; mir-305	3	3	7	6	656.886	673.25	448.747	506.201	552.817	589.725	0.0932422
miR-305-3p	CGGCACATGTTGAAGTACATTCAA	MIPF0000158; mir-305	0	0	0	1	0	0	0	84.3668	0	42.1834	NA
miR-281-3p	CTGTCATGGAATTGCTCTCTTT	MIPF0000087; mir-46	2	6	9	5	437.924	1346.5	576.96	421.834	507.442	884.167	0.801075
miR-281-5p	AAGAGAGCTATCTGTCGACAGTA	MIPF0000087; mir-46	0	0	0	2	0	0	0	168.734	0	84.3668	NA
miR-100-5p	AACCCGTAAATCCGAACTTGTG	MIPF0000033; mir-10	2	0	3	3	437.924	0	192.32	253.1	315.122	126.55	-1.3162
miR-278-3p	TCGGTGGGACTTTCGTCCGTTT	MIPF0000155; mir-278	2	1	3	3	437.924	224.417	192.32	253.1	315.122	238.758	-0.400359
miR-284-5p	CCTGGAATTAAGTTGACTGTGCA	MIPF0000228; mir-284	2	1	4	2	437.924	224.417	256.427	168.734	347.175	196.575	-0.820585
lin-4-5p	TCCCTGAGACCCTAACTTGTGA	MIPF0000303; lin-4	0	0	1	1	0	0	64.1067	84.3668	32.0533	42.1834	0.396201
lin-4-3p	ACAAGTTTTGATCTCAGGTATA	MIPF0000303; lin-4	0	0	1	0	0	0	64.1067	0	32.0533	0	NA
miR-987-5p	TAAAGTAAATAGTCTGGATTGATG	MIPF0000859; mir-987	0	1	2	0	0	224.417	128.213	0	64.1067	112.208	0.807632
miR-2-5p	AGCTCATCAAAGCTGGCTGTGATA	MIPF0000049; mir-2	1	0	2	0	218.962	0	128.213	0	173.588	0	NA
miR-33-5p	GTGCATTGTAGTCGCATTGTC	MIPF0000070; mir-33	0	1	3	3	0	224.417	192.32	253.1	96.16	238.758	1.31204
miR-6-3p	TATCACAGTGGCTGTTCTTTTT	MIPF0000119; mir-6	0	0	0	1	0	0	0	84.3668	0	42.1834	NA
miR-87-3p	TTGAGCAAAATTTCAGGTGT	MIPF0000152; mir-87	0	0	1	1	0	0	64.1067	84.3668	32.0533	42.1834	0.396201
miR-124-5p	GGCATTCACCGCGTGCCTTA	MIPF0000021; mir-124	0	0	1	1	0	0	64.1067	84.3668	32.0533	42.1834	0.396201
miR-190-5p	AGATATGTTTGATATTCTTG	MIPF0000076; mir-190	0	0	1	0	0	0	64.1067	0	32.0533	0	NA
miR-210-3p	CTTGTGCGTGTGACAGCGG	MIPF0000086; mir-210	0	1	1	0	0	224.417	64.1067	0	32.0533	112.208	1.80763
miR-449-3p	TGGCAGTGTGGTTAGCTGGTT	MIPF0000133; mir-449	0	0	1	0	0	0	64.1067	0	32.0533	0	NA
miR-449-5p	TGGCAGTGTGGTTAGCTGGTTA	MIPF0000133; mir-449	0	1	1	0	0	224.417	64.1067	0	32.0533	112.208	1.80763
miR-989-3p	TGTGATGTGACGTAGTGGAAC	MIPF0000885; mir-989	0	0	1	0	0	0	64.1067	0	32.0533	0	NA
miR-994-5p	CTAAGGAAATAGTAGCCGTGAT	MIPF0001045; mir-994	0	1	1	3	0	224.417	64.1067	253.1	32.0533	238.758	2.89701
miR-315-5p	GGCTTTCTGAGCAACAATCAAAA	MIPF0000141; mir-315	1	0	1	0	218.962	0	64.1067	0	141.534	0	NA
let-7-3p	CTATACAACGTGCTAGCTTTCT	MIPF0000002; let-7	3	2	3	4	656.886	448.833	192.32	337.467	424.603	393.15	-0.111035
let-7-5p	CGAGGTAGTAGGTTGTATAGTA	MIPF0000002; let-7	2	5	4	3	437.924	1122.08	256.427	253.1	347.175	687.592	0.985887
miR-1000-5p	ATATTGTCCTGTCACAGCAG	MIPF0000701; mir-1000	1	0	2	0	218.962	0	128.213	0	173.588	0	NA
miR-252-5p	CTAAGTACTAGTGCCGCAGGAGA	MIPF0000285; mir-252	0	1	0	0	0	224.417	0	0	0	112.208	NA
miR-137-3p	TATTGCTTGAGAATACACGTAG	MIPF0000106; mir-137	0	0	0	1	0	0	0	84.3668	0	42.1834	NA
miR-133-3p	TTGGTCCCCTTCAACCAGCTG	MIPF0000029; mir-133	0	0	0	2	0	0	0	168.734	0	84.3668	NA
miR-13-3p	TATCACAGCCATTTTGACGAGT	MIPF0000049; mir-2	2	1	1	3	437.924	224.417	64.1067	253.1	251.015	238.758	-0.0722241
miR-375-3p	TTTGTTCGTTTGGCTTAAGTT	MIPF0000114; mir-375	0	1	0	2	0	224.417	0	168.734	0	196.575	NA
miR-14-3p	TCAGTCTTTTTCTCCCTCCTATC	MIPF0000182; mir-14	3	1	8	5	656.886	224.417	512.853	421.834	584.87	323.125	-0.856022
miR-11-3p	CATCACAGTCTGCGTTCTTGCA	MIPF0000252; mir-11	0	2	3	6	0	448.833	192.32	506.201	96.16	477.517	2.31204
miR-67-3p	TCACAACCTCTTTGAGTGAGCTA	MIPF0000293; mir-67	0	0	2	1	0	0	128.213	84.3668	64.1067	42.1834	-0.603799
miR-927-3p	TGGTAAAGCGTAGGAATTCTAAA	MIPF0000452; mir-927	0	1	3	2	0	224.417	192.32	168.734	96.16	196.575	1.03157
miR-927-5p	TTTAGAATTCCTCCGCTTTACCA	MIPF0000452; mir-927	0	0	0	3	0	0	0	253.1	0	126.55	NA
miR-275-3p	TCCGGTACCTGAAGTAGCGCGCGA	MIPF0000187; mir-275	0	0	0	1	0	0	0	84.3668	0	42.1834	NA
